# Supplementary material
Source: ML conference proceedings conference paper supplement (https://aclanthology.org/2026.semeval-1.138)
Supplement: SupplementaryMaterial [file ensemble_diagram.pdf › ensemble_diagram.pdf]

Input: Subreddit + Reddit Post Text

### Squeeze

DeBERTa-v3-base  
184M  
weight: 2.0

(original + lowercase) / 2

### Grandmaster

Twitter-RoBERTa-large  
355M  
weight: 1.5

(original + lowercase) / 2

### Specialist

BiMamba  
130M  
weight: 1.0  
forward → Attention Pooling ← backward

(original + lowercase) / 2

### Logician

DeBERTa-v3-small  
44M  
weight: 1.0

(original + lowercase) / 2

Confidence-Weighted Voting  
 $\sum w_i p_i / \sum w_i$

Threshold  $\tau = 0.55$

Yes (Conspiracy)

No (Not Conspiracy)
